1 **ULTRASTRUCTURAL STUDY OF THE ESOPHAGUS AND**  
2 **STOMACH OF *Arapaima gigas* (Schinz 1822), JUVENILE**  
3 **PAICHE, CREATED EXCAVATED TANK**

4

5 Keila Silva Pinto<sup>1</sup>, Luana Félix de Melo<sup>2</sup>, Julia Bastos de Aquino<sup>2</sup>, Jerônimo

6 Vieira Dantas Filho<sup>1\*</sup>, Maria Angelica Miglino<sup>2</sup>, Sandro de Vargas Schons<sup>1</sup>,

7 Rose Eli Grassi Rici<sup>2</sup>

8

9 <sup>1</sup>Programa de Pós-Graduação em Ciências Ambientais, Universidade Federal  
10 de Rondônia (UNIR), Rolim de Moura, RO, Brazil

11

12 <sup>2</sup>Programa de Pós-Graduação em Anatomia de Animais Domésticos e  
13 Silvestres, Escola de Medicina Veterinária e Zootecnia, Universidade de São  
14 Paulo (USP), São Paulo, SP, Brazil

15

16 \*Corresponding author

17 E-mail: [jeronimovdantas@gmail.com](mailto:jeronimovdantas@gmail.com) (Dantas Filho, JV).

18

19 These authors contributed equally to this work.

20 &These authors also contributed equally to this work.

21

22

23 **Abstract**

24 Paiche (*Arapaima gigas*) belongs to the Kingdom *Animalia*, Phylum *Chordata*,

25 Class *Actinopterygii*, Order *Osteoglossiformes*, Family *Arapaimidae*, Genus

26 *Arapaima*, and its origin may date to the Jurassic period. The species has natural

27 habitat in the Amazonian rivers, found mainly in marginal lakes, being considered

28 an important fishing resource, with high market value and high demand for meat

29 and leather in both Brazilian and international trade. This study aims to describe

30 the morphology of the esophagus and stomach by light microscopy and scanning

31 electronics microscopy. The esophagus was presented as muscular, short,

32 tubular and fan-shaped in the cranial portion, also presenting deep longitudinal  
33 folds, and the entire mucosa is covered by mucus secretory cells with distinct  
34 morphological characteristics. Pirarurcu's stomach has a J-shape divided into  
35 three regions: cardiac with a lighter aspect, fundus portion with few folds in the  
36 mucosa, and pyloric with deeper folds, also presenting gastroliths in fundus and  
37 pyloric portions. Both microscopy studies highlighted three glandular regions,  
38 composed by mucoid columnar epithelial cells, gastric crypts with different  
39 shapes and sizes depending on each portion, in which the different shapes of  
40 the mucosal folds in each region of the stomach were evident, and digitiform  
41 microsaliences were found in the cardiac region, and micro-orifices and  
42 desmosome in the fundus region. Also, fundus and pyloric portions produce more  
43 mucus than the cardiac. Then morphology found was consistent with the eating  
44 habits and management of distinct characteristics of the digestive tract.

45

46 **Keywords:** arapaimidae, digestive tract, digitiform microsaliencia, taste sensory  
47 cells

48

## 49 **Introduction**

50 Paiche (*Arapaima gigas* Schinz, 1822) is the largest scale fish of the Amazonian  
51 rivers, being found mainly in locations with low or no currents, such as marginal  
52 lakes [1]. *A. gigas* is considered the most important and emblematic species of  
53 Amazonian ichthyofauna, not only for its large size, but also for the historical and  
54 economic context of artisanal fishing [2]. Among the fish of the Order  
55 *Osteoglossiformes*, paiche is the best known and, such as others of this order, it  
56 is characterized by the presence of parasphenoid bone [3].

57 However, due to the high exploitation of natural resources and lack of inspection,  
58 paiche is in a worrying situation, mainly due to the reduction of natural resources  
59 and near disappearance of its habitat [4]. On the other hand, it presents itself as  
60 an important fishing economic activity, as it is a neotropical fish, of large size,  
61 high rusticity, easy adaptation to high rates of density and high temperatures, as  
62 well as good feed conversion and excellent weight gain in low water quality  
63 environments [5]. However, knowledge of the fishing biology of these species is  
64 necessary, especially, to understand eating peculiarities, aiming to offer rational  
65 measures of exploitation [6]. The architecture and the structure of the  
66 gastrointestinal tract have been described in several fish species, mainly due to  
67 the interest of wide variations in both morphology and functions related to  
68 nutritional dynamics, physiological changes in aquaculture target species and  
69 digestive pathologies [7-9].

70 According to Rodrigues and Cargnin-Ferreira [10], the morphological aspects of  
71 the digestive tract of the *A. gigas*, in the juvenile phase is similar to other  
72 carnivorous teleosts, allowing the species to ingest, store and digest large foods.  
73 In particular, such studies are relevant to understand morphophysiological  
74 particularities related to seizure, digestion, and absorption of food in target  
75 aquaculture species, and thus reduce adaptive flexibility in response to changes  
76 in diet, due to the decrease in the variation in nutrient composition in natural  
77 environment, administered in captivity production [11].

78 Based on the aforementioned, the propose of this investigation is to describe the  
79 morphological and structural aspects of the esophagus and stomach of the young  
80 *Arapaima gigas*, raised in commercial creations in excavated tanks.

81

## 82 **Material and Methods**

83 Thus, esophagus and stomach were collected from six specimens of Paiche  
84 (*Arapaima gigas*), in the juvenile phase, raised in an intensive system of tanks  
85 excavated and fed with a pelletized commercial diet, from an aquaculture  
86 property in the municipality of Pimenta Bueno/Rondônia/Brazil. The fish were  
87 caught for the consumption of the property, by artisanal fishing, and after removal  
88 of the viscera, the esophagus and stomach were washed in running water,  
89 removing the food content present inside and fixed in 10% buffered  
90 formaldehyde. The sample was processed at Facilite Advanced Center for  
91 Diagnostic Imaging - CADI- FMVZ-USP.

92 Organ dissection and mucosal exposure were performed on a plank to  
93 macroscopically observe the different structures. Then these organs were later  
94 documented with a photographic camera. For microscopic analysis, tissue  
95 samples were dehydrated in a series of increasing concentrations of ethanol (70  
96 to 100%) and diaphanized in xylol, with subsequent inclusion in histological liquid  
97 paraffin and then microtomed at 5µm thick and subsequently stained with  
98 Hematoxylin-Eosin (HE). The images were obtained with the Nikon Eclipse E-  
99 800 light microscope.

100 Part of the material was processed for scanning electron microscopy (SEM).  
101 Samples fixed in 10% formaldehyde were dehydrated in increasing sets of  
102 alcohols at concentrations of 50%, 70%, 90% and 100%, dried in LEICA critical  
103 point apparatus in CPD300 (FMVZ-USP), fixed with carbon glue in aluminum  
104 metal bases (stub) and metallized (sputting) with gold in the EMITECH K550  
105 metallizer (FMVZ-USP), being analyzed and photographed under a LEO 435VP  
106 scanning electron microscope (FMVZ-USP).

107 The project was presented and approved by the Research Ethics Committee on  
108 the use of animals of the Federal University of Rondônia, with protocol No.  
109 043/2019.

110

## 111 **Results**

112 Anatomically, the esophagus and stomach of the *Arapaima gigas* are tubular  
113 organs composed of modified muscle fibers that connect the pharyngeal cavity  
114 to the proximal intestine (Fig. 1A). The esophagus is presented in form of a  
115 muscular and short rectilinear tube (Fig. 1 A, C), but at the pharyngo-esophageal  
116 junction (cranial portion), a marked dilation of the fan-shaped organ (a) is  
117 observed, and in the caudal portion a visible reduction of the lumen (b). On the  
118 other hand, the stomach is a J-shaped muscle sac (Fig. 1 A), located on the left  
119 side of the cavity, extending from the esophagus to the proximal bowel portion.  
120 The esophageal mucosa is characterized by numerous longitudinal folds, most  
121 evident in the medial and caudal region (arrows on Fig. 1 C).

122 As the esophageal mucosa is replaced by gastric, such folds become thicker and  
123 more visible. However, after stomach fixation in 10% formaldehyde it was  
124 possible to differentiate it into three distinct portions, mainly by the color and  
125 shape of the distribution of the gastric folds, in: cranial or cardiac portion, with a  
126 lighter aspect and the central sulcus and the mucosa folds parallel to the central  
127 axis of the organ (c). In the medial or fundus portion, gastric folds are more  
128 evident, with the presence of transverse sulcus (d) and in the caudal or pyloric  
129 portion, gastric folds are higher with deep sulcus (e). During the opening of the  
130 paiche's stomach (Fig. 1 B) the presence of small gastroliths was observed in the  
131 fungal and pyloric portions (d, e).

132 In the microscopic study of light, it was observed that the esophagus is wrapped  
133 by a stratified epithelium (Fig. 2 A) (line) with three different cell types: the simple  
134 epithelial cells, the mucous cells and the claviform cells. The number of layers  
135 varied from 1 to 12 layers of cells. The mucous cells presented higher numbers  
136 and they were distributed among the layers of the stratified epithelium. By  
137 histochemical methods, with hematoxylin and eosin (H/E) two cell types could be  
138 differentiated: acidophil and basophil (Fig. 2 A).

139 Morphologically, the acidophilic cells presented cubiform shape, enucleated,  
140 plasma membrane well demarcated and acidophylic cytoplasm of granulous  
141 aspect. The basophilic cells are larger, presenting round-shaped and basophilic  
142 cytoplasm. The epithelial cells present varied morphology from columnar to  
143 cuboidal (Fig. 2 B) and they are observed in greater number in places where the  
144 epithelium is composed of up to two layers of cells. Goblet cells (Fig. 2 A) are  
145 observed in smaller numbers, nucleated, presenting a light halo around the  
146 nucleus, being usually located in the medial region of the epithelium. The lamina  
147 propria of the mucosa and submucosa (Fig. 2 B) are composed of dense, not  
148 presenting gland, well-developed connective tissue and with no separation  
149 between them. Bundles of smooth muscles infiltrating the connective tissue of the  
150 mucous tunica were also observed, being more evident in the cranial portion of  
151 the esophagus. The muscle wrap is formed by bundles of muscles in a vertical  
152 direction.

153 By scanning electron microscopy (SEM) it was observed that esophageal  
154 mucosa is composed of numerous folds and sulcus in different directions (Fig. 2  
155 D, E), and it is wrapped by epithelial cuboid-shaped cells, with the apical portion  
156 of some cells discontinued, suggesting the release of cytoplasmic content to

157 lumen in the form of cellular explosion, and large amount of mucus on the surface  
158 and inside the interdigitations of the mucosa. However, in the cranial portion of  
159 the esophagus, mucosal folds are not observed, and the lining epithelium is  
160 formed by cells rounded to polyhedral, with a large amount of mucus.  
161 Furthermore, numerous projections in taste bud-shapes (Fig. 2 C) are observed  
162 on the epithelial surface, randomly distributed by the epithelium line. Such  
163 projections are intra-epithelial structures formed by grouping of support cells of  
164 the pavement type and in the center, numerous sensory cells with microvilli  
165 immersed in the central pore (white arrowhead). However, the surface is formed  
166 by epithelial cells with digitiform micro-saliences in the caudal portion of the  
167 esophagus.

168 The stomach mucosa of the *A. gigas* is covered with the simple columnar  
169 epithelium with the presence of numerous crypts and gastric folds, of morphology,  
170 height and in different numbers between the portions. In the cardiac portion (Fig.  
171 3 A), the crypts have the end of a rounded-to-round aspect, with the presence of  
172 smaller secondary crypts among them. The mucosal lamina propria is formed by  
173 glandular loose connective tissue, which is observed in the base region of the  
174 crypts.

175 In the fundus portion (Fig. 3 B), the epithelial cells of wrapping are columnar, with  
176 slightly eosinophilic cytoplasm and the crypts are elevated and slender with the  
177 pointed end, besides being more frequent compared to the cardiac portion. In the  
178 mucosal lamia propria, a greater number of glands than connective tissue is  
179 observed, which are larger than the cardiac portion.

180 In the pyloric portion the epithelial cells present a columnar to balloon form, with  
181 areas of epithelium hyperplasia, with up to three layers of cells. Such cells are

182 also observed in glands located in the mucosal lamina propria. The gastric crypts  
183 of this region are thicker and shorter.

184 There is no separation between the mucous wrap and mucosal lamina propria,  
185 however the connective tissue of the mucous wrap is formed of thicker and  
186 denser collagen than the mucosal lamina propria. The muscular wrap is formed  
187 of bundles of smooth muscles arranged in two layers, horizontally and vertically.  
188 The ultramicroscopic scanning study of the surface of the paiche's stomach  
189 mucosa presented it is formed of numerous folds and interdigitations (D). These  
190 are overlaid by cuboid epithelial cells (E) with micro-orifices (arrowhead) on the  
191 surface of the plasma membrane of these cells.

192 At the ends of the mucosa folds, epithelial cells present dilation of the intercellular  
193 spaces, which allows the visualization of desmosome (arrows). Inside the  
194 interdigitations, cuboid epithelial cells are replaced by epithelial cells with the  
195 plasma membrane (Fig. 3 D) with digitiform micro-salience. These cells reduce  
196 in quantity in the fundus portion and they were not found in the pyloric part. Mucus  
197 was observed in the three regions of the stomach; however the pyloric and  
198 cardiac portion were the sites with the highest amount, also presenting mucus  
199 and more flattened villi (Fig. 3 F).

200

## 201 **Discussion**

202 The anatomical arrangement of the digestive system of the paiche (*A. gigas*) is  
203 similar to other teleosts. However, the stomach has varied shapes and regions;  
204 structurally adapted to food types. Anatomically, the stomach of the *A. gigas* is  
205 elongated in J-shape, similar to the species *Rhamdia quelen* [7], with a chemical  
206 region, and another mechanical, highly muscularized, with crushing function of  
207 the ingested food, also observed in piscivore stomachs [12].



208 The esophagus of the *A. Gigas* is a muscular organ, with several folds of mucosa  
209 and a fan-shaped dilation in the cranial portion with marked reduction of lumen  
210 in the medial portion, thus enabling distension during ingestion of large foods.  
211 Generally, this anatomical aspect has been observed in other carnivorous fish  
212 such as *Hoplias malabaricus* [13], *Salminus brasiliensis* [14], and *H. lacerdae*  
213 [15], as well as in other teleosts with different eating habits [15-17]. According to  
214 Rodrigues and Cargnin-Ferreira [10] and Scadeng et al. [18] the several amount  
215 of folds of mucosa supports the integrity of the esophageal wall, especially during  
216 the sudden distension motivated by quick ingestion.

217 By the scanning microscopy and light microscopy, a variation in the morphology  
218 of epithelial cells of esophageal wrapping was observed, thus, in the cranial  
219 portion, the mucosa was covered by rounded to polyhedral cells with the  
220 presence of taste corpuscle and in the other portions, secretory epithelial cells.  
221 The gustatory system of teleosts is activated by water-soluble substances, and  
222 these are involved in detection, selection, and ingestion.

223 According to Santos et al. [19] there is a close relationship between the  
224 distribution pattern of taste corpuscles and the way fish locate and select foods,  
225 in carnivores usually present in the buccopharyngeal cavity and little observed in  
226 the esophagus. The presence of such corpuscles in the cranial portion of the  
227 paiche esophagus, allow them to eject the already ingested food and even the  
228 eversion of the stomach when they feed on something strange or not palatable,  
229 as well as observed in salmon [20], and other teleosts [19].

230 In addition to the taste corpuscles, three different cell types were also observed  
231 in the stratified epithelium of the esophagus, mainly in the medial and caudal  
232 portions, the basophilic, acidophilic and claviform mucous cells. The epithelium

233 of the teleosts is quite variable according to species, which may vary from  
234 stratified squamous to stratified columnar with three cell types: secretory cells of  
235 neutral, acidic and mixed mucopolysaccharides [21], such cells were also  
236 observed in the paiche's esophagus of this study. According to Rodrigues and  
237 Cargnin-Ferreira [10] the goblet cells produce mucus that protect the esophageal  
238 wall against chemical and mechanical action during the passage of food.  
239 Nevertheless, acid mucus produced by acidophilic cells, is associated with  
240 binders capable of aggregating food particles, besides efficiently protecting the  
241 epithelium [22].

242 Bertin [23] describes on stomach of the teleosts different anatomical  
243 conformations and it can be grouped into three types: siphonal, cecum, and  
244 linear. The siphonal stomach has two branches, one descending, corresponding  
245 to the cardiac and the pyloric branch that ascends. The cecum stomach on the  
246 other hand, has two branches that interpose in the union region, the blind and  
247 rectilinear fundus and a muscular tube. However, it was possible to anatomically  
248 and histologically differentiate the stomach of the *Arapaima gigas* in three distinct  
249 portions: the cardiac, fundus, and pyloric, all glandular and presenting different  
250 histological characteristics, mainly at the ends of the gastric crypts, as well as  
251 the shape and number of glands of the mucosal lamina propria. Such  
252 morphological conformations corroborate the classification suggested by  
253 Cardoso et al. [24], that divide the stomach according to the anatomical  
254 structures and the presence or not of gastric glands in three parts, as described  
255 in the paiche.

256 The study of the digestive tract of several fish species, particularly teleosts, has  
257 attracted the attention of many researchers, mainly due to the wide structural

258 variation with diversity of eating habits and behaviors, which are not found in other  
259 vertebrates. Based on anatomical and histological characteristics of the digestive  
260 tract, we can comprehend the feeding of fish [25]. The observation of gastrolithic  
261 pebbles inside the paiches' stomach of this study may be associated with an  
262 adaptation to the type of pelletized food. For Magalhães et al. [26] the presence  
263 of pebbles in the stomach is related to the maceration process of pelletized foods,  
264 aided by stomach peristaltic waves. However, considering the low number of  
265 specimens in these studies, further research with native and captive fish are  
266 necessary to verify whether the presence of these pebbles is a food adaptation.  
267 On the ultramicroscopic scanning study of the surface of the paiche stomach  
268 mucosa, it was observed that it is formed by folds and interdigitations, also it is  
269 overlaid with different cell types such as cuboid epithelial cells, which secrete  
270 mucus, and epithelial cells with digitiform micro-salience. Cells with digitiform  
271 micro-salience were also observed in the caudal portion of the paiche's  
272 esophagus. Morphological studies based on *Colossoma macropomum* also  
273 observed the presence of such cells, overlaying the esophagus [27]. According  
274 to Carrassón [28], these cells protect the epithelial surface and anchor the mucus  
275 secreted by goblet cells, besides being associated with fluids and ions absorption.

276

## 277 **Conclusion**

278 Based on anatomical and morphological aspects observed in the esophagus of  
279 this study, the anatomical fan-shaped of the cranial portion, as well as the  
280 presence of taste corpuscles, enables the storage of food before passing to the  
281 stomach and the neurostimulation of flavors by taste corpuscles stimulate the  
282 bundles of muscle present in the submucosa wrap, carrying out the regurgitation

283 or deglutition. Then morphology found was consistent with the eating habits and  
284 management of distinct characteristics of the digestive tract. However, these  
285 studies were carried out in juvenile fish, raised in aquaculture systems, fed with  
286 pelletized feed, which may not be observed in *A. gigas* in natural environment.

287

### 288 **Bioethics and biosecurity committee approval**

289 The project was presented and approved by the Research Ethics Committee on  
290 the use of animals of the Federal University of Rondônia, with protocol No.  
291 043/2019.

292

### 293 **Acknowledgments**

294 We would like to thank CAPES/PROCAD Amazônia for the scholarship  
295 conceptions and for the resources made available for the study to be carried out.

296

### 297 **Author contributions**

298 **Conceptualization:** Keila Silva Pinto, Luana Félix de Melo, Julia Bastos de

299 Aquino, Jerônimo Vieira Dantas Filho, Maria Angelica Miglino, Sandro de

300 Vargas Schons, Rose Eli Grassi Rici

301 **Data curation:** Keila Silva Pinto, Luana Félix de Melo, Julia Bastos de Aquino,

302 Jerônimo Vieira Dantas Filho, Maria Angelica Miglino, Sandro de Vargas Schons,

303 Rose Eli Grassi Rici

304 **Formal analysis:** Keila Silva Pinto, Luana Félix de Melo, Julia Bastos de Aquino,

305 Jerônimo Vieira Dantas Filho, Maria Angelica Miglino, Sandro de Vargas Schons,

306 Rose Eli Grassi Rici

307 **Funding acquisition:** Keila Silva Pinto, Luana Félix de Melo, Julia Bastos de  
308 Aquino, Jerônimo Vieira Dantas Filho, Maria Angelica Miglino, Sandro de Vargas  
309 Schons, Rose Eli Grassi Rici

310 **Investigation:** Keila Silva Pinto, Luana Félix de Melo, Julia Bastos de Aquino,  
311 Jerônimo Vieira Dantas Filho, Maria Angelica Miglino, Sandro de Vargas Schons,  
312 Rose Eli Grassi Rici

313 **Methodology:** Keila Silva Pinto, Luana Félix de Melo, Julia Bastos de Aquino,  
314 Jerônimo Vieira Dantas Filho, Maria Angelica Miglino, Sandro de Vargas Schons,  
315 Rose Eli Grassi Rici

316 **Project administration:** Luana Félix de Melo, Julia Bastos de Aquino, Maria  
317 Angelica Miglino, Sandro de Vargas Schons, Rose Eli Grassi Rici

318 **Resources:** Keila Silva Pinto, Luana Félix de Melo, Julia Bastos de Aquino,  
319 Jerônimo Vieira Dantas Filho, Maria Angelica Miglino, Sandro de Vargas Schons,  
320 Rose Eli Grassi Rici

321 **Supervision:** Sandro de Vargas Schons

322 **Validation:** Keila Silva Pinto, Luana Félix de Melo, Julia Bastos de Aquino,  
323 Jerônimo Vieira Dantas Filho, Maria Angelica Miglino, Sandro de Vargas  
324 Schons, Rose Eli Grassi Rici

325 **Visualization:** Keila Silva Pinto, Luana Félix de Melo, Julia Bastos de Aquino,  
326 Jerônimo Vieira Dantas Filho, Maria Angelica Miglino, Sandro de Vargas  
327 Schons, Rose Eli Grassi Rici

328 **Writing – original draft:** Keila Silva Pinto, Sandro de Vargas Schons

329 **Writing – review & editing:** Keila Silva Pinto, Luana Félix de Melo, Julia  
330 Bastos de Aquino, Jerônimo Vieira Dantas Filho, Maria Angelica Miglino,  
331 Sandro de Vargas Schons, Rose Eli Grassi Rici

332

### 333 **References**

- 334 1. Amaral E, Sousa IS, Gonçalves ACT, Braga R, Ferraz P, Carvalho G. Manejo de  
335 pirarucus (*Arapaima gigas*) em Lagos de Várzea de Uso Exclusivo de Pescadores  
336 Urbanos e Ribeirinhos. *Série Protocolos de Manejo de Recursos Naturais*, Instituto de  
337 Desenvolvimento Sustentável Mamirauá – IDSM/OS/MCTI Programa de Manejo de  
338 Pesca (PMP). 2011.
- 339 2. Cavali J, Nunes CT, Dantas Filho, JV, Nóbrega BA, Pontuschka RB, Souza MLR, Porto  
340 MO. Chemical composition of commercial cuts of pirarucu (*Arapaima gigas*) processed  
341 in different weight classes in the Western Amazon. *Revista Ibero-Americana de Ciências*  
342 *Ambientais*. 2021; 12(4).
- 343 3. Nelson LS. *Fishes of the world*. 3. Ed. New York: John Wiley & Sons. 1994.
- 344 4. Nunes, ESCL, Franco RM, Mársico ET, Neves MS. Qualidade do pirarucu (*Arapaima*  
345 *gigas* Shing, 1822) salgado seco comercializado em mercados varejistas. *Revista do*  
346 *Instituto Adolfo Lutz*. 2012; 71: 520-529.
- 347 5. Azevedo PB, Morey GAM, Malta JCO. 2017. Mortalidade de juvenis de *Arapaima gigas*  
348 (Pisces: Arapaimidae) de piscicultura do norte do Brasil, causadas por *Hysterothylacium*  
349 sp. e *Goeziaspinulosa* (Nematoda: Anisakidae). *Biota Amazônia*. 2017; 7: 103-107.
- 350 6. Dantas Filho JV, Cavali J, Nunes CT, Nóbrega BA, Gasparini LRF, Souza MLR, Porto  
351 MO, Rosa BL, Gasparotto PHG, Pontuschka RB. Proximal composition, caloric value and  
352 price-nutrients correlation of comercial cuts of tambaqui (*Colossoma macropomum*) and  
353 pirarucu (*Arapaima gigas*) in diferente body weight classes (Amazon: Brazil). *Research,*  
354 *Society and Development*. 2021; 10: e23510111698.
- 355 7. Hernández DR, Pérez Ganeselli M, Domitrovic HA. Morphology, histology and  
356 histochemistry of the digestive system of South American  
357 Catfish (*Rhamdia quelen*). *Internacional Journal of Morhology*. 2009; 27: 105-111.
- 358 8. Løkka G, Austbø L, Falk K, Bjerkås I, Koppang EO. Intestinal  
359 morphology of the wild Atlantic salmon (*Salmo salar*). *Journal Morphology*. 2013; 274:  
360 859-876.

- 361 9. Faccioli CK, Chedid RA, Amaral AC; Franceschini VB, Vicentini CA. Morphology and  
362 histochemistry of the digestivetract in carnivorous freshwater *Hemisorubim platyrhynchos*  
363 (Siluriformes: Pimelodidae). *Micron*. 2014; 64: 10-19.
- 364 10. Rodrigues APO, Cargnin-Ferreira E. Morphology and histology of the pirarucu (*Arapaima*  
365 *gigas*) digestive tract. *Internacional Journal Morphology*. 2017; 35: 950-957.
- 366 11. Buddington RK, Krogdahl A, Bakke-mckellep AM. The intestines of carnivorous fish:  
367 structure and functions and the relations with diet. *Acta Physiologica Scandinavica*. 1997;  
368 638: 67-80.
- 369 12. Resende EK, Pereira RAC, Almeida VLL, Silva AG. Peixes onívoros da planície  
370 inundável do rio Miranda, Pantanal, Mato Grosso do Sul, Brasil. Corumbá: Boletim de  
371 Pesquisa Embrapa Pantanal. 2000; 60 p.
- 372 13. Menin E, Mimura OM. Anatomia comparativa do esôfago de seis peixes Teleostei de  
373 água doce de distintos hábitos alimentares. *Revista Ceres*. 1993; 15: 334-369.
- 374 14. Rodrigues SS, Menin E. Anatomia do tubo digestivo de *Salminus brasiliensis* (Cuvier,  
375 1817) (Pisces, Characidae, Salmininae). *Biotemas*. 2008; 21: 65-75.
- 376 15. Hani YMI, Marchand A, Turies C, Kerambrum E, Palluel O, Bado-Nilles A, Beaudouin R,  
377 Porcher J, Geffard A, Dedourge-Geffard O. Digestive enzymes and gut morphometric  
378 parameters of threespine stickleback (*Gasterosteus aculeatus*): Influence of body size  
379 and temperature. *PLOS ONE*. 2018; 13: e0194932.
- 380 16. Schuingues CO, Lima MG, Lima AR, Martins DS, Costa GM. Anatomy of the  
381 bucofaryngeal cavity of *Sorubim trigonocephalus* (Siluriformes, Osteichthyes).  
382 *Pesquisa Veterinária Brasileira*. 2013; 33:1256-1262.
- 383 17. Fernandes MN, Cruz AL, Costa OTF, Perry SF. Morphometric partitioning of the  
384 respiratory surface area and diffusion capacity of the gills and swim bladder in juvenile  
385 Amazonian air-breathing fish, *Arapaima gigas*. *Micron*. 2012; 43: 961–970.
- 386 18. Scadeng M, McKenzie C, He W, Bartsch H, Dubowitz DJ, Stec D, Leger JS. Morphology  
387 of the Amazonian Teleost Genus *Arapaima* Using Advanced 3D Imaging. *Frontiers in*  
388 *Physiology*. 2020; 11.

- 389 19. Santos AFGN, Santos LNS, Araújo FG. Digestive tract morphology of the Neotropical  
390 piscivorous fish *Cichla kelberi* (Perciformes: Cichlidae) introduced into an oligotrophic  
391 Brazilian reservoir. *Biologia Tropical*. 2011; 59: 1245-1255.
- 392 20. Gioda CR, Pretto A, Freitas CS, Leitemperger J, Loro VL, Lazzari R, Lissner LA,  
393 Baldisserotto B, Salbego J. Different feeding habits influence the activity of digestive  
394 enzymes in freshwater fish. *Ciência Rural*. 2017; 47: e20160113.
- 395 21. Santo ML, Arantes FP, Pessali TC, Santos JE. Morphological, histological and  
396 histochemical analysis of the digestive tract of *Trachelyopterus striatulus* (Siluriformes:  
397 Auchenipteridae). *Zoologia*. 2015; 32: 296-305.
- 398 22. Morrison CM et al. 1987. Histology of the Atlantic cod, *Gadus morhua*: an atlas. Pt. 4:  
399 Eleutheroembryo and larva.
- 400 23. Bertin L. Appareil digestif. In: Grassé PP. *Traite de zoologia*. 1958; 13: 1248-1302.
- 401 24. Cardoso NN, Firmiano EMS, Gomes ID, Nascimento AA, Sales A, Araújo FG.  
402 Histochemical and immunohistochemical study on endocrine cells (5HT, GAS, and SST)  
403 of the gastrointestinal tract of a teleost, the characin *Astyanax bimaculatus*. *Acta*  
404 *Histochemica*. 2015; 117: 595-604.
- 405 25. Machado MRF, Souza HO, Souza VL, Azevedo A, Goitein R, Nobre AD. Morphological  
406 and anatomical characterization of the digestive tract of *Centropomus parallelus* and *C.*  
407 *Undecimalis*. *Acta Scientiarum Biological Sciences*. 2013; 35: 467-474, 2013.
- 408 26. Magalhães Junior FO, Santos MJM, Allaman IB, Soares Junior IJ, Silva RF, Braga LGT.  
409 Digestible Protein Requirement of Pirarucu Juveniles (*Arapaima gigas*) Reared in  
410 Outdoor Aquaculture. *Journal of Agricultural Science*. 2017; 9(9).
- 411 27. Cavali, J, Dantas Filho JV, Nóbrega BA, Andrade LHV, Pontuschka RB, Gasparotto PHG,  
412 Francisco RS, Campeiro Junior LD, Porto MO. Benefits of adding virginiamycin to  
413 *Arapaima gigas* (Schinz, 1822) diet cultivated in the Brazilian Amazon. *Scientifica*. 2020;  
414 doi: <https://doi.org/10.1155/2020/5953720>
- 415 28. Carrassón M, Grau A, Dopazo LR, Crespo S. A histological, histochemical and  
416 ultrastructural study of the digestive tract of *Dentex dentex* (Pisces, Sparidae). *Histology*  
417 *and Histopathology*. 2006; 21: 579-593
- 418



419

## 420 **Figure captions**

421

422 **Fig 1.** In A, external photomacrography of the *A. gigas* digestive tube, (a) esophageal cranial  
423 portion (b) caudal esophageal portion straight, short and muscular tube; (c, d, e) J-shaped  
424 stomach. In C mucosa of the esophagus and stomach, (a) fan-shaped esophageal cranial portion  
425 (b), medial portion and caudal (arrows) with presence of longitudinal folds in the esophageal  
426 mucosa, in (c) cardiac portion of the stomach, lighter aspect, in (d) mucosa in gastric folds of the  
427 fundus portion and (e) pyloric portion of the stomach. In B stomach (d, e) fungal and pyloric  
428 portions respectively with presence of gastroliths.

429

430 **Fig. 2.** Esophageal photomicrograph *A. gigas*. Cross-section in A, B, (HE)/ML. In A esophageal  
431 mucosa lyxiform cells with halo around the nucleus (cc), cuboid cells, granulous aspect (arrows),  
432 the major, rounded basophilic cells and basophilic cytoplasm (\*). B epithelial cells of prismatic-  
433 to cuboids-shape, epithelium is formed by up to two layers of cells (arrowhead), stratified  
434 epithelium with the presence of secretory epithelial cells (trace), mucosal and submucosa lamina  
435 propria with dense connective tissue, no presenting gland, without separation between them (a),  
436 muscle wrap with bundles of muscles in vertical direction (b). In C, D, E, and F scanning electron  
437 microscopy (SEM) of the surface of the esophageal mucosa. In C cranial esophageal region,  
438 taste corpuscles to the center sensory cells with microvilli immersed in the central pore (white  
439 arrow head). In D and E presents the medial esophageal region, folds (db) and interdigitations  
440 (s) in different directions wrapped by cuboid-shaped epithelial cells (\*), mucus release (arrow),  
441 and in F caudal portion of the esophageal surface is wrapped of epithelial cells with digitiform  
442 micro-saliences (md).

443

444 **Fig. 3.** Photomicrography of *A. gigas* stomach. Cross-section in A, B, C (HE) in (ML). In A, cardiac  
445 portion, crypts with a rounded-to-round aspect (\*\*), and secondary crypts (\*), B in the fundus  
446 portion, column epithelial cells (arrow), and slightly eosinophilic cytoplasm with elevated and  
447 slender crypts and pointed extremity (\*\*\*), in the mucosal lamina propria, more glands (gl) than  
448 connective tissue, these being larger than the cardiac portion. In C pyloric portion, baloon-shaped

449 columnar epithelial cells (cl), epithelium hyperplasia (line), and thicker and shorter gastric crypts  
450 (dotted double arrow). In D, E, F in the SEM of the glandular surface of the stomach mucosa, in  
451 the cardiac portion (D) numerous folds (db) and interdigitations (s) and inside the interdigitations,  
452 cuboid epithelial cells replaced by epithelial cells with the digitiform micro-salience plasma  
453 membrane (\*). E, cubiform epithelial cells with the presence of micro orifices (arrowheads), and  
454 at the ends of the mucosa folds the epithelial cells present dilation of the intercellular spaces,  
455 which allows the visualization of desmosome (arrows). In F, the pyloric portion presents flatter  
456 and thicker folds with presence of mucus (\*\*).

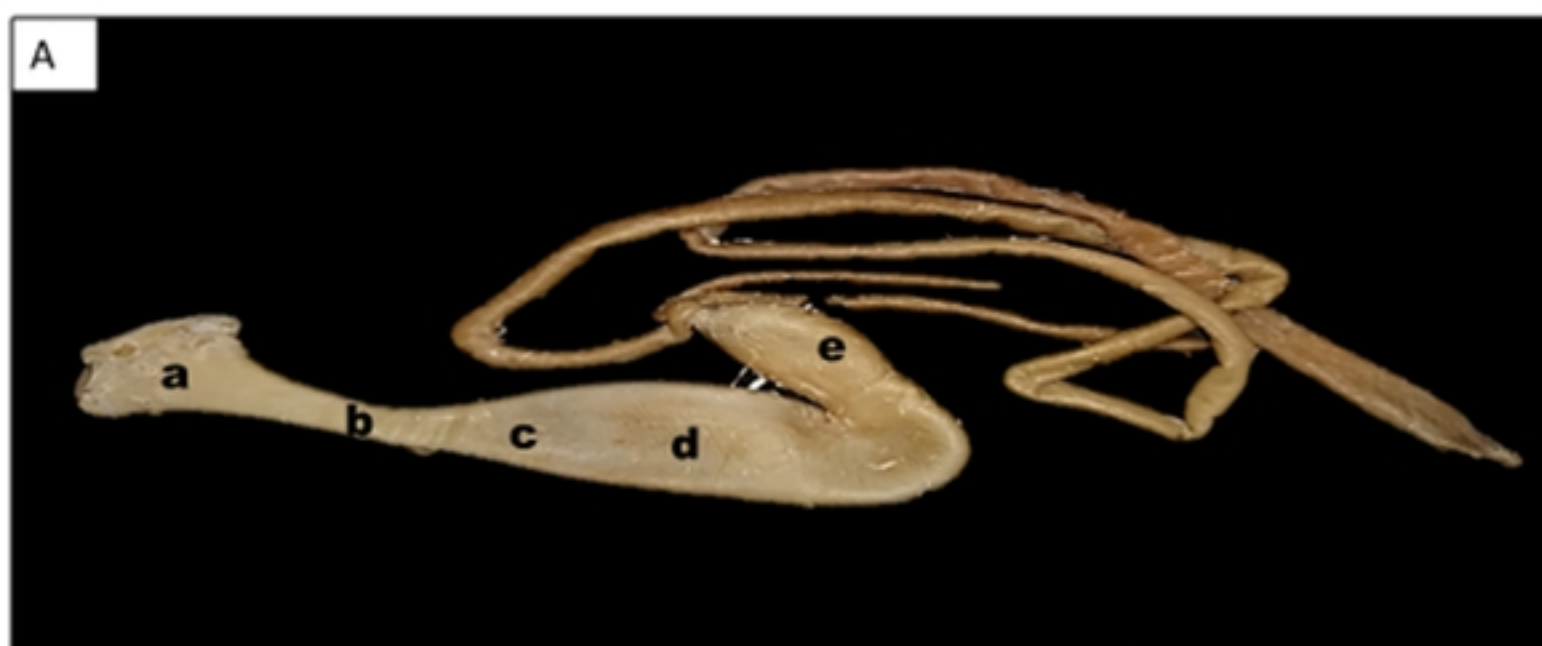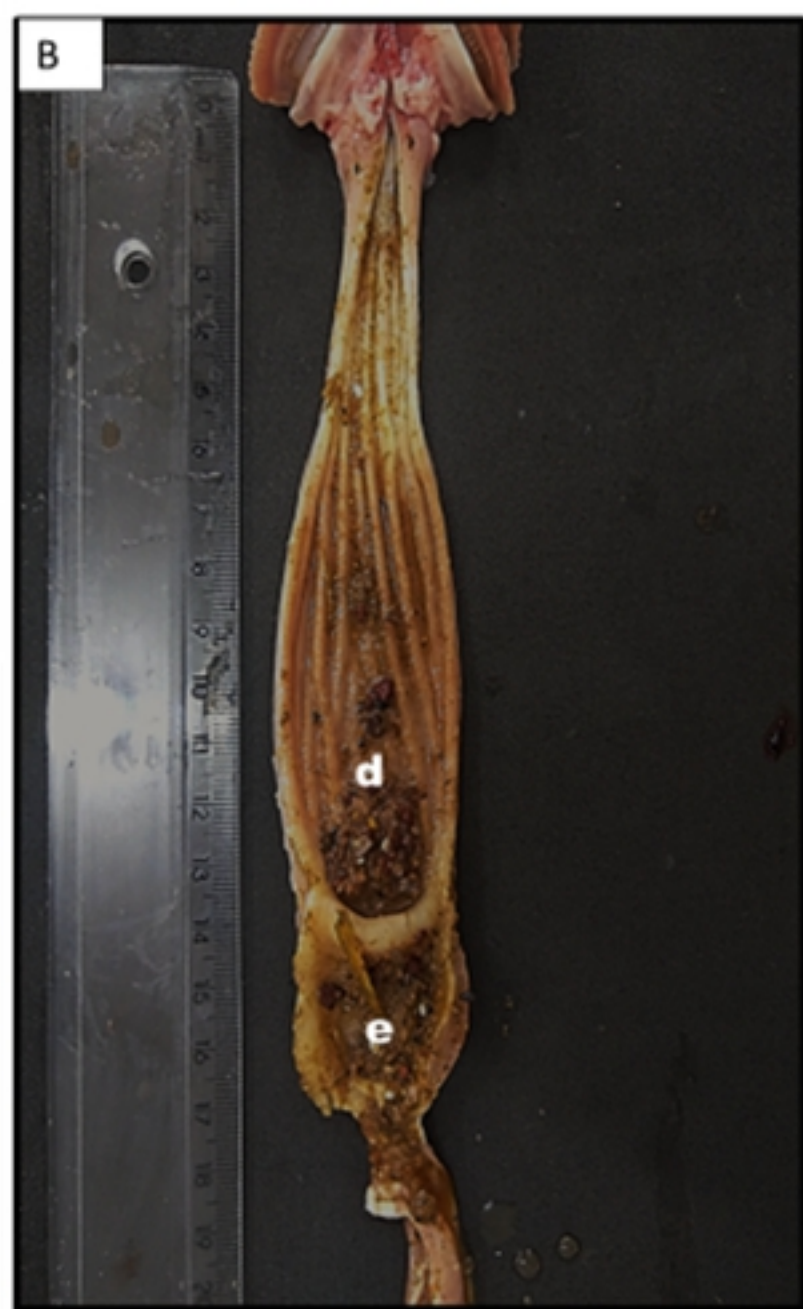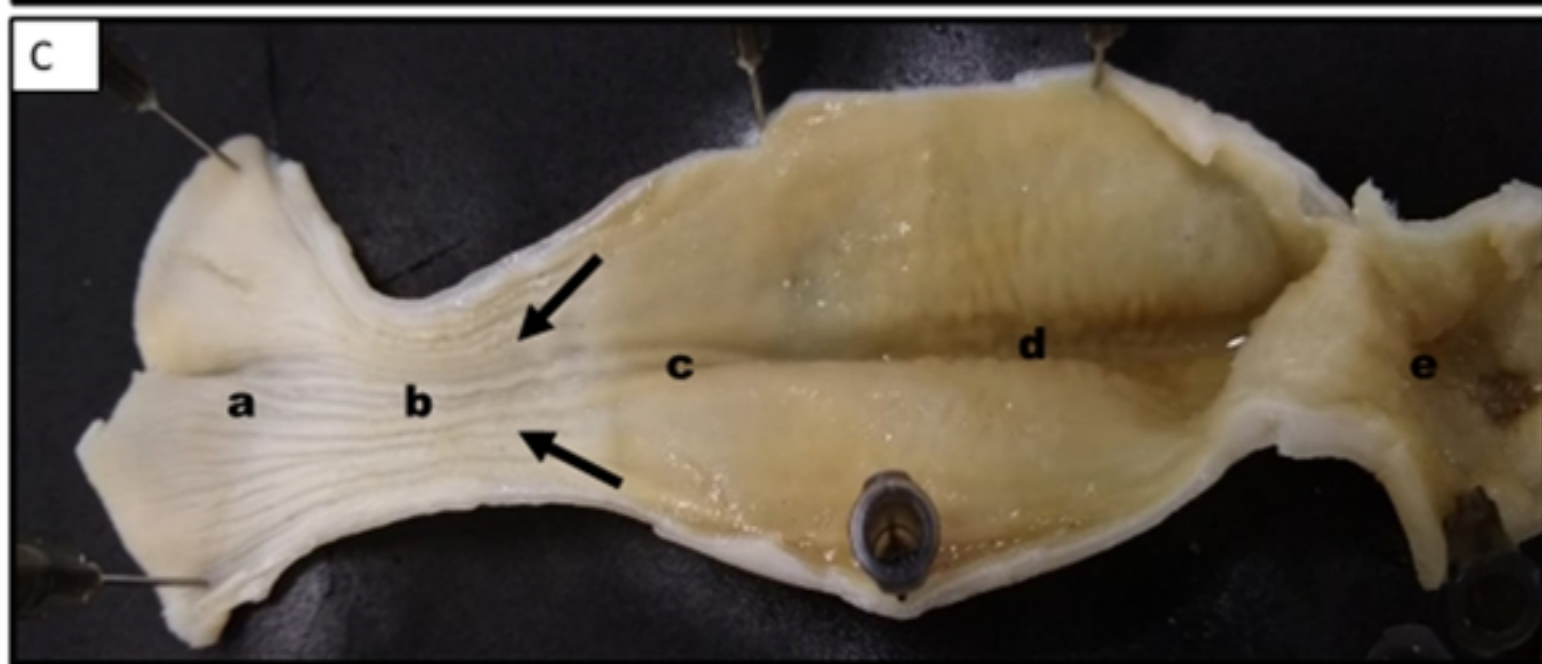

Figure 1

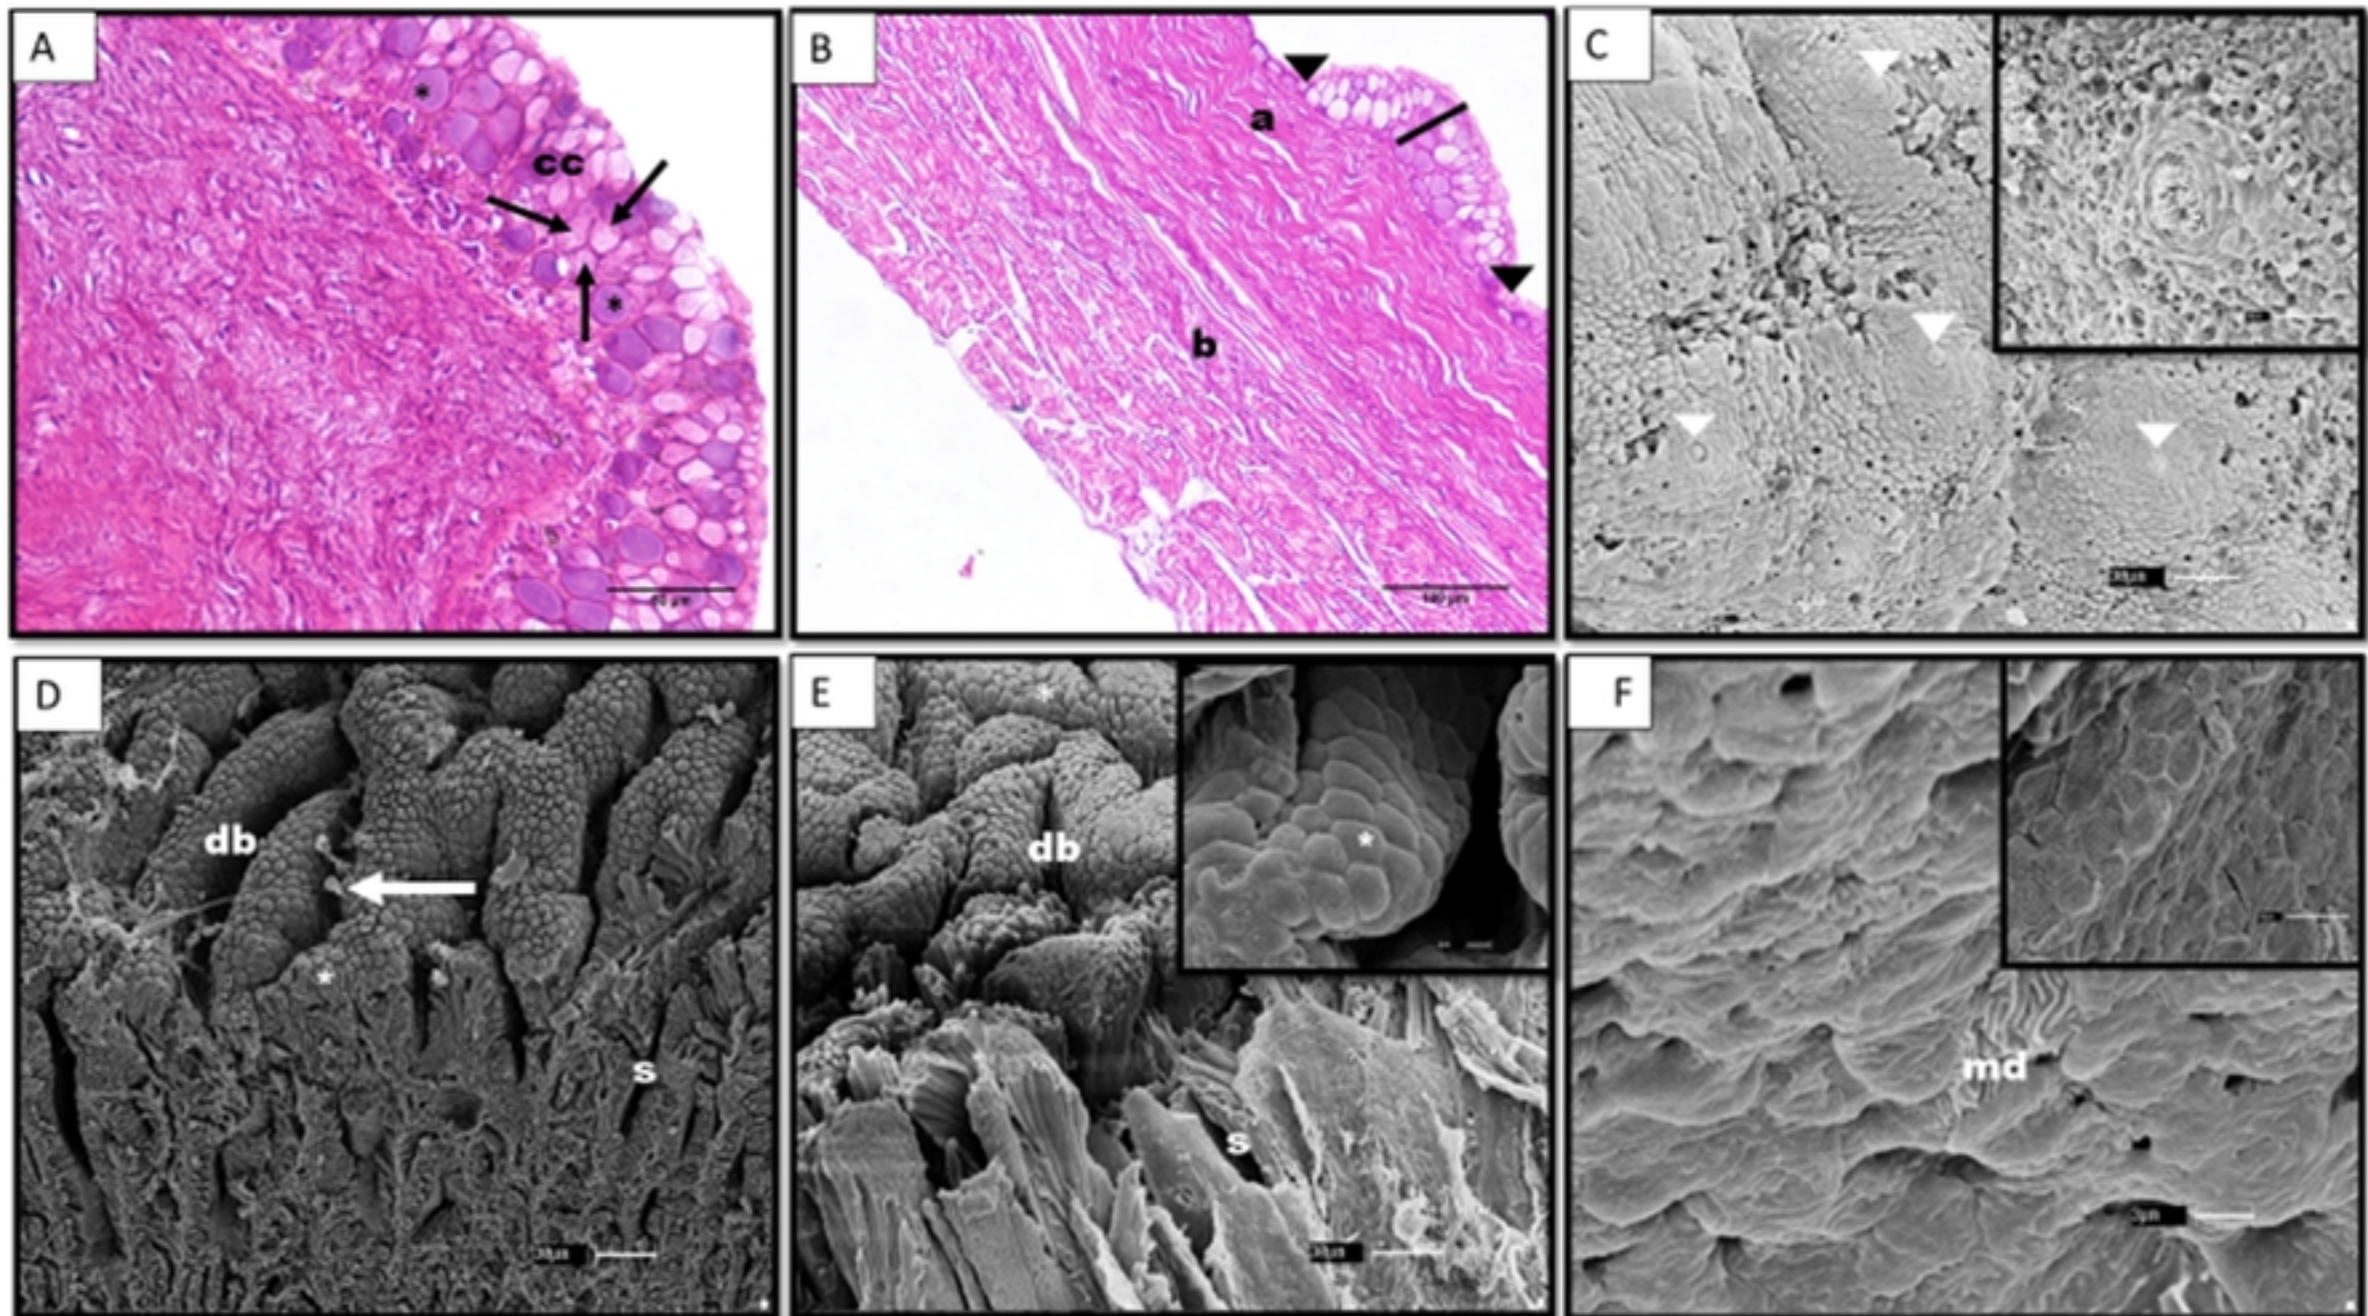

Figure 2

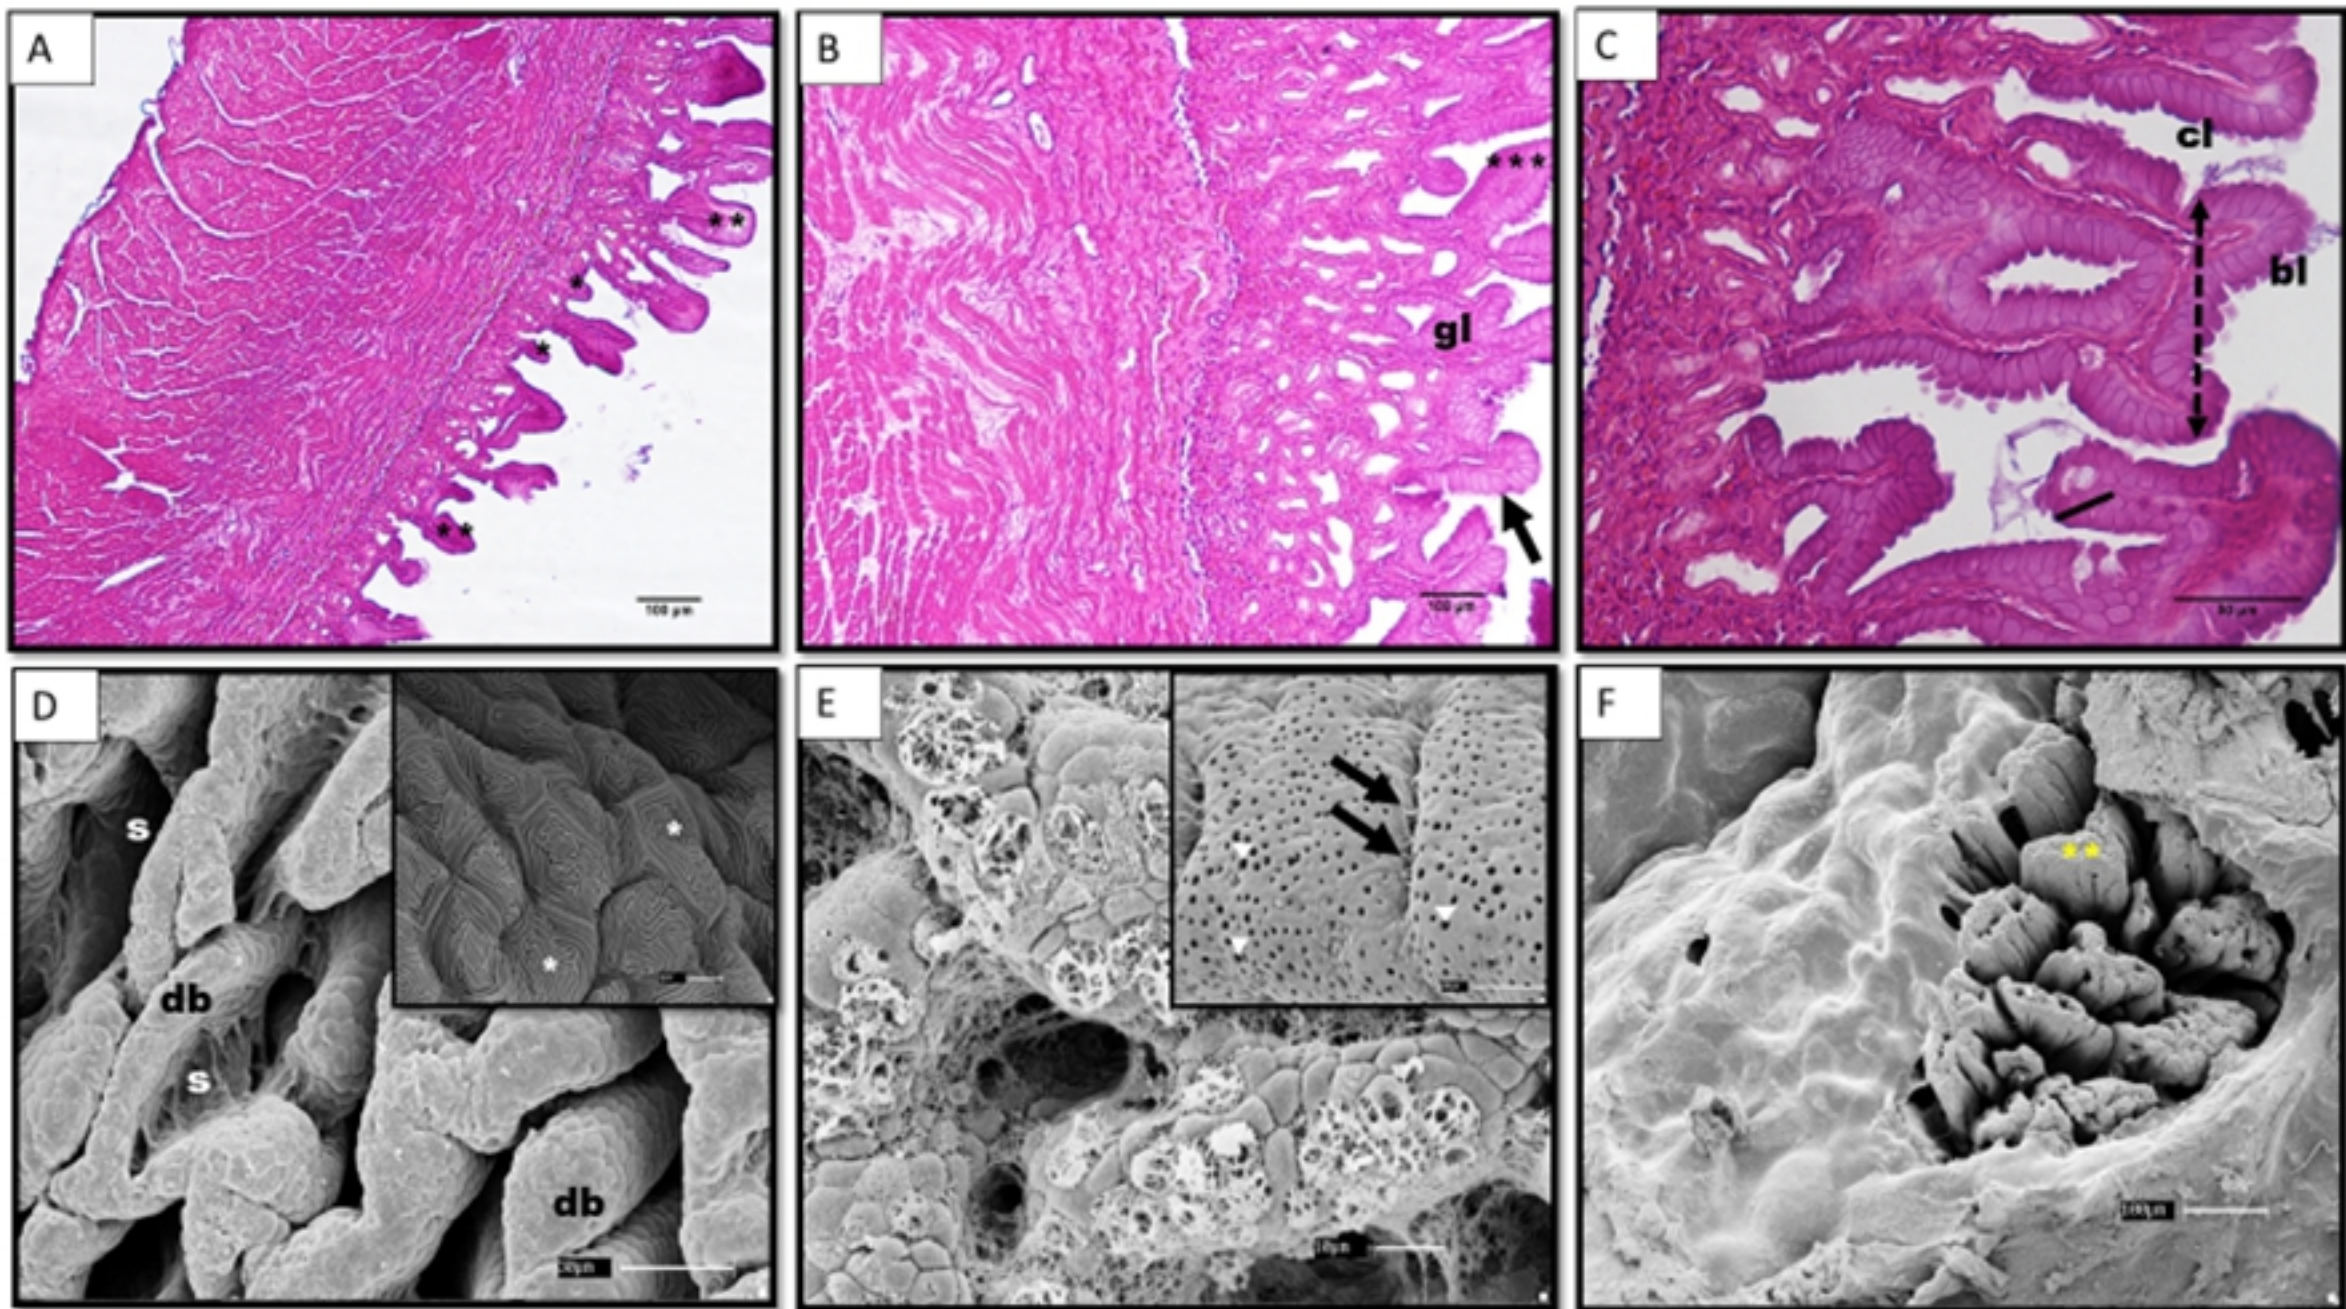

Figure 3
